# Supplementary figures and images for: Kidins220/ARMS downregulation by excitotoxic activation of NMDARs reveals its involvement in neuronal survival and death pathways
Source: Oxford University Press journal article supplement (doi:10.1242/jcs.056473), 2009-09-16

**Kidins**

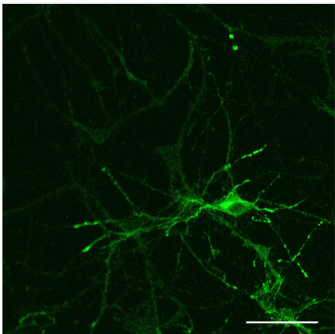

**NR1**

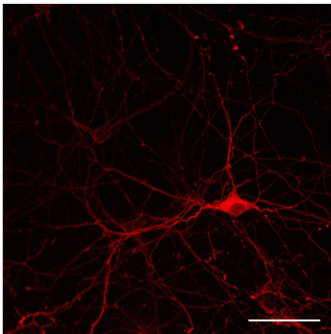

**Merge**

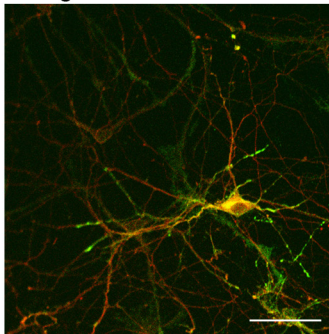

**Kidins**

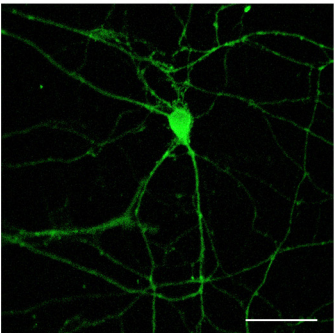

**NR2A/B**

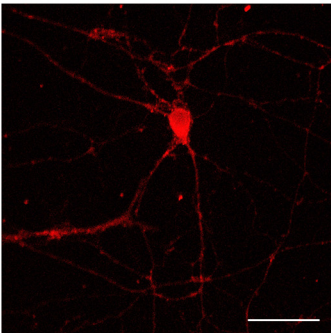

**Merge**

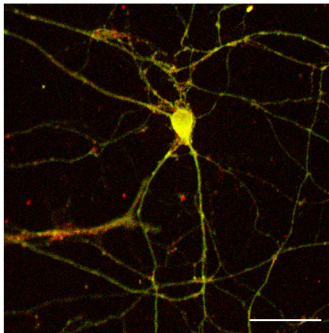

Supplement: jcs056473figs1.pdf [file jcs056473figs1.pdf]

**A**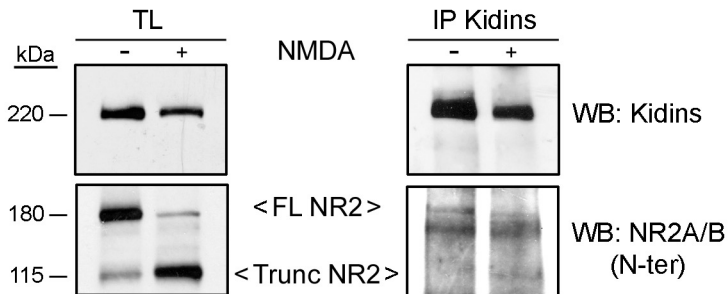**B**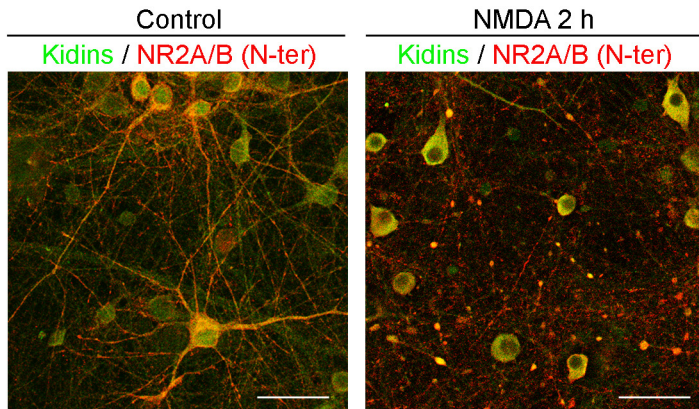

Supplement: jcs056473figs4.pdf [file jcs056473figs4.pdf]
